# Supplementary material for: Heavy atom engineering of Ru(ii) complex based sonosensitizers for enhancing antifungal therapy
Source: Royal Society of Chemistry journal article supplement (doi:10.1039/d5qi00180c), 2025-01-01
Supplement: d5qi00180c1.pdf [file d5qi00180c1.pdf]

Supplementary Information (SI) for Inorganic Chemistry Frontiers.

This journal is © the Partner Organisations 2024

## Supporting Information

### Heavy Atom engineering of Ru(II) Complex based Sonosensitizers for Enhancing Antifungal Therapy

Qian Li<sup>a,b,†</sup>, Yida Pang<sup>b,c,†</sup>, Longcan Mei<sup>b,†</sup>, Shiming Liang<sup>d,†</sup>, Huiling Wang<sup>b</sup>, Yujia Jiao<sup>e</sup>, Sheng Qiu<sup>a,\*</sup>,  
Hui Chen<sup>e,\*</sup>, Xiwen Xing<sup>f,\*</sup>, and Yao Sun<sup>b,\*</sup>

*a. Department of Neurosurgery, Fifth School of Clinical Medicine of Zhejiang Chinese Medical University (Huzhou Central Hospital), Huzhou Key Laboratory of Basic Research and Clinical Translation for Neuromodulation, Huzhou 313099, P. R. China.*

*b. State Key Laboratory of Green Pesticide, International Joint Research Center for Intelligent Biosensor Technology and Health, College of Chemistry, Central China Normal University, Wuhan 430079, China.*

*c. Hubei Jiangxia Laboratory, Wuhan 430200, China.*

*d. National Key Laboratory of Agricultural Microbiology, College of Biomedicine and Health, Huazhong Agricultural University, Wuhan 430070, China.*

*e. Department of Dermatology, Tongji Hospital, Tongji Medical College, Huazhong University of Science and Technology, Wuhan 430030.*

*f. Department of Biotechnology, College of Life Science and Technology, Jinan University, Guangzhou 510632.*

*\*E-mail address: qius2001@126.com (S. Qiu); chenhui@tjh.tjmu.edu.cn (H. Chen); xingxiwen@jnu.edu.cn (X. Xing); sunyaogbasp@ccnu.edu.cn (Y. Sun).*

<sup>†</sup>Authors contributed equally.

The Synthesis of complexes **RuH**, **RuCl** and **RuBr**.

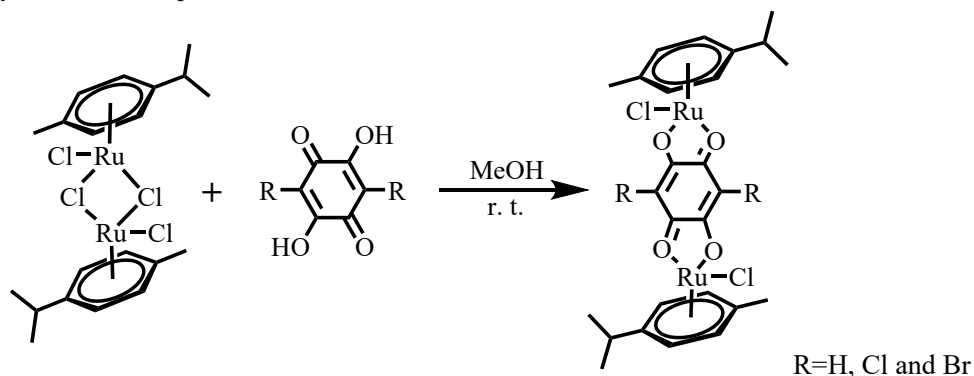

**RuH:** Under a nitrogen atmosphere, dissolve dichloro(p-cymene)ruthenium(II) dimer (612.0 mg, 1 mmol, 1 equiv) and 2,5-dihydroxy-1,4-benzoquinone (140.0 mg, 1 mmol, 1 equiv) in 20 mL of anhydrous methanol in a 50 mL round-bottom flask. Stir the reaction mixture at room temperature for 12 h. Afterward, separate the resulting solid using vacuum filtration, and wash the product sequentially with methanol (3 × 30 mL) and diethyl ether (3 × 30 mL). Dry the solid under vacuum to collect the red solid **RuH** (610.5 mg, 90.3%). <sup>1</sup>H NMR (400 MHz, CDCl<sub>3</sub>) δ 5.91 (s, 2H), 5.74 (d, J = 5.7 Hz, 4H), 5.49 (d, J = 5.6 Hz, 4H), 3.07 – 2.98 (m, 2H), 2.41 (s, 6H), 1.44 (d, J = 6.9 Hz, 12H). <sup>13</sup>C NMR (100 MHz, MeOD) δ 184.82, 121.89, 118.83, 101.09, 97.37, 80.81, 78.86, 31.35, 20.93, 17.22. HR-MS is shown in **Fig. S3**: m/z = 650.334 for [M-Cl]<sup>+</sup>.

**RuCl:** Under a nitrogen atmosphere, dissolve dichloro(p-cymene)ruthenium(II) dimer (612.0 mg, 1 mmol, 1 equiv) and chloranilic acid (208.9 mg, 1 mmol, 1 equiv) in 20 mL of anhydrous methanol in a 50 mL round-bottom flask. Stir the reaction mixture at room temperature for 12 hours. Afterward, separate the resulting solid using vacuum filtration, and wash the product sequentially with methanol (3 × 30 mL) and diethyl ether (3 × 30 mL). Dry the solid under vacuum to collect the reddish-brown solid **RuCl** (693.7 mg, 93.6%). <sup>1</sup>H NMR (400 MHz, CDCl<sub>3</sub>) δ 5.76 (d, J = 6.1 Hz, 4H), 5.51 (d, J = 6.0 Hz, 4H), 3.08–2.88 (m, 2H), 2.37 (s, 6H), 1.40 (d, J = 6.9 Hz, 12H). <sup>13</sup>C NMR (100 MHz, MeOD) δ 178.26, 122.42, 118.88, 101.74, 98.17, 81.13, 79.29, 31.68, 21.11, 16.96. HR-MS is shown in **Fig. S7**: m/z = 718.256 for [M-Cl]<sup>+</sup>.

**RuBr:** Under a nitrogen atmosphere, dissolve dichloro-bis(4-methylisopropylbenzene)ruthenium(II) (612.0 mg, 1 mmol, 1 equiv) and bromanilic acid (297.8 mg, 1 mmol, 1 equiv) in 20 mL of anhydrous methanol in a 50 mL round-bottom flask. Stir the reaction mixture at room temperature for 12 h. Afterward, separate the resulting solid using vacuum

filtration, and wash the product sequentially with methanol (3 × 30 mL) and diethyl ether (3 × 30 mL). Dry the solid under vacuum to collect the reddish-brown solid **RuBr** (792.3 mg, 95.1%). <sup>1</sup>H NMR (400 MHz, CDCl<sub>3</sub>) δ 5.77 (d, J = 5.8 Hz, 4H), 5.51 (d, J = 5.7 Hz, 4H), 3.05 – 2.87 (m, 2H), 2.39 (s, 6H), 1.43 (d, J = 6.8 Hz, 12H). <sup>13</sup>C NMR(100 MHz, MeOD) δ 179.24, 121.98, 118.91, 101.89, 97.45, 80.76, 79.29, 31.54, 21.16, 17.24. HR-MS is shown in **Fig. S9**: m/z = 802.812 for [M-Cl]<sup>+</sup>.

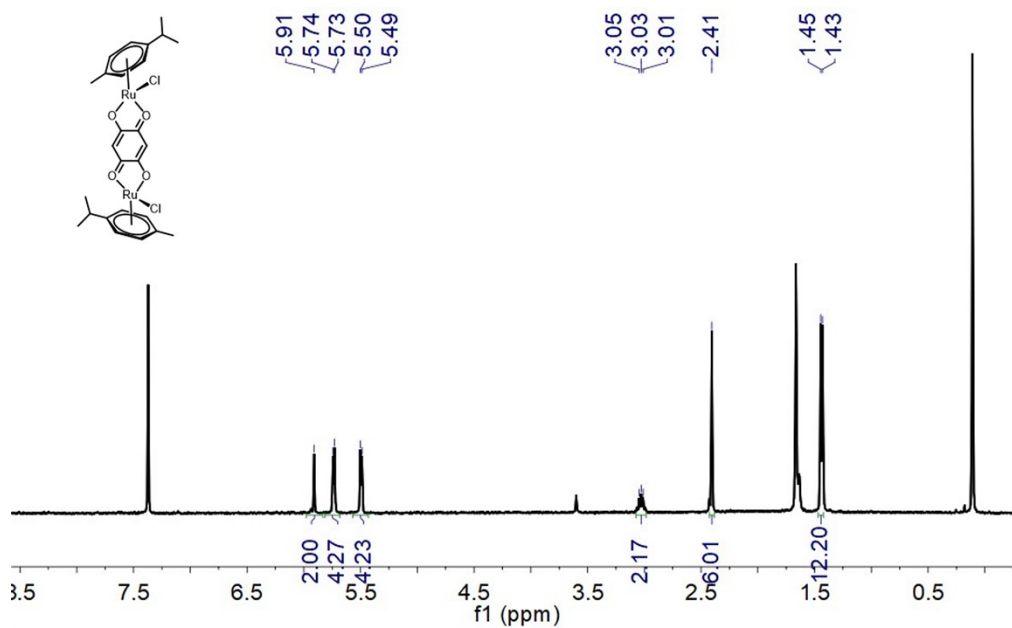

Fig. S1  $^1\text{H}$  NMR spectrum (400 MHz,  $\text{CDCl}_3$ , 298 K) of RuH.

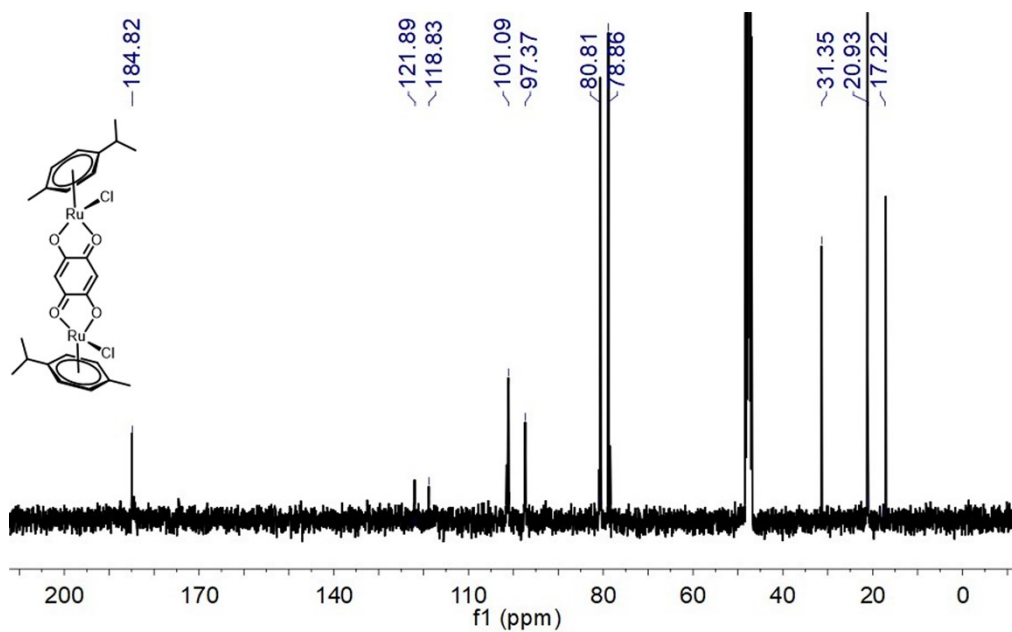

Fig. S2  $^{13}\text{C}$  NMR spectrum (100 MHz, MeOD, 298 K) of RuH.

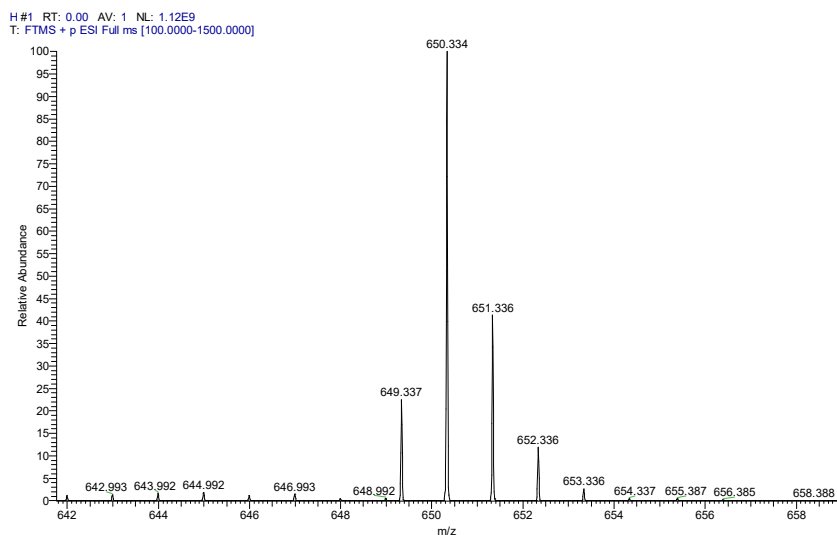

**Fig. S3** High-Resolution Mass Spectrometry (HR-MS) spectrum of **RuH**.

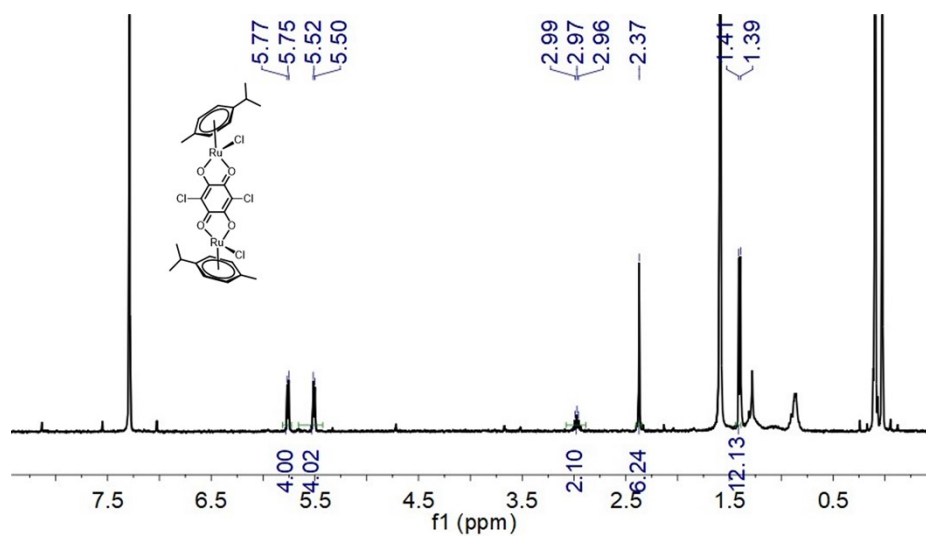

**Fig. S4**  $^1\text{H}$  NMR spectrum (400 MHz,  $\text{CDCl}_3$ , 298 K) of **RuCl**.

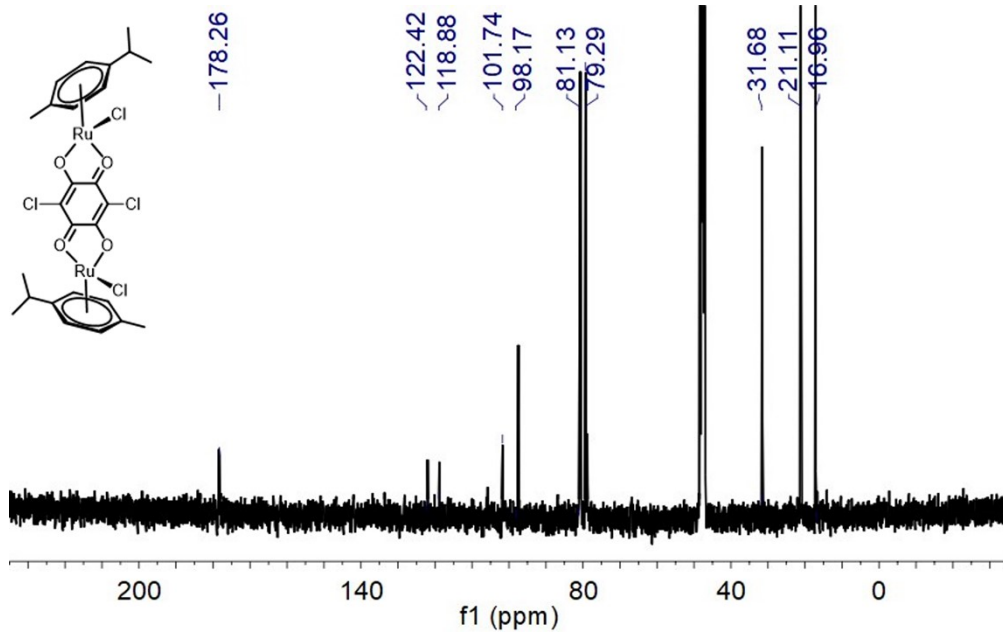

Fig. S5  $^{13}\text{C}$  NMR spectrum (100 MHz, MeOD, 298 K) of RuCl.

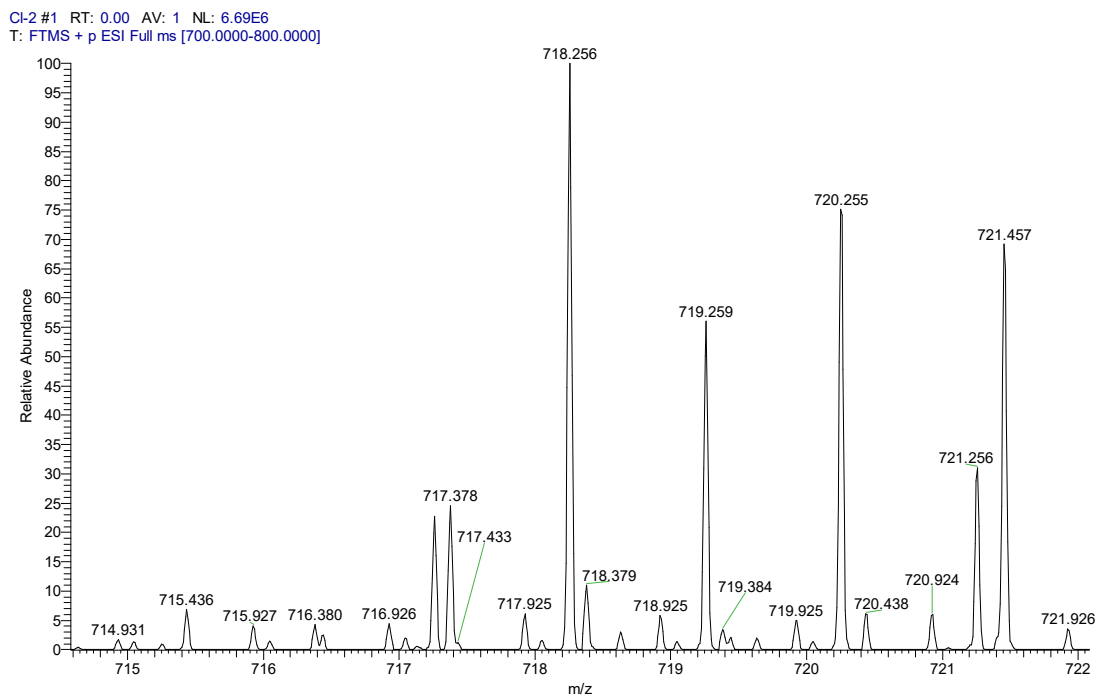

Fig. S6 HR-MS spectrum of RuCl.

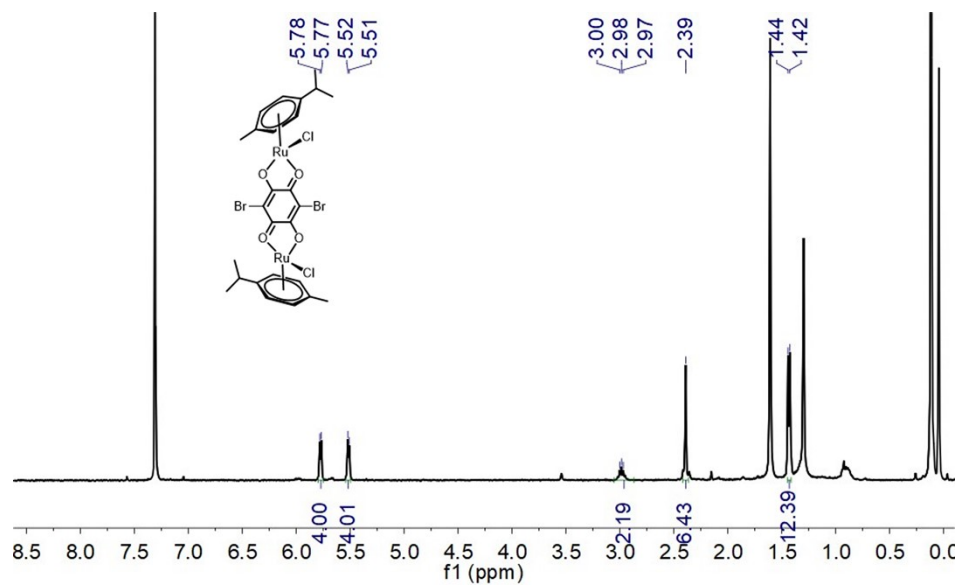

Fig. S7  $^1\text{H}$  NMR spectrum (400 MHz,  $\text{CDCl}_3$ , 298 K) of RuBr.

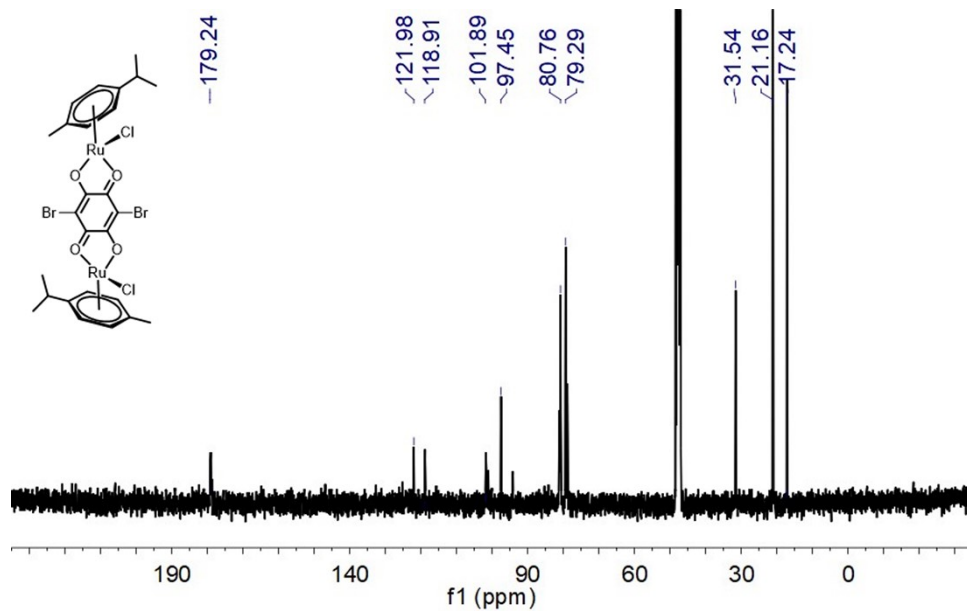

Fig. S8  $^{13}\text{C}$  NMR spectrum (100 MHz, MeOD, 298 K) of RuBr.

Br #15 RT: 0.03 AV: 1 NL: 4.92E6  
T: FTMS + p ESI Full ms [780.0000-850.0000]

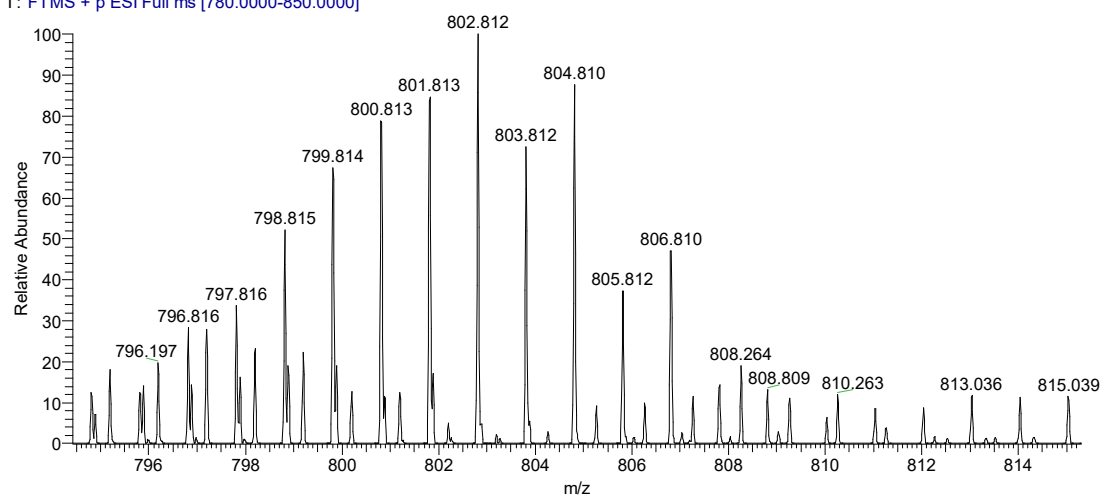

**Fig. S9** HR-MS spectrum of **RuBr**



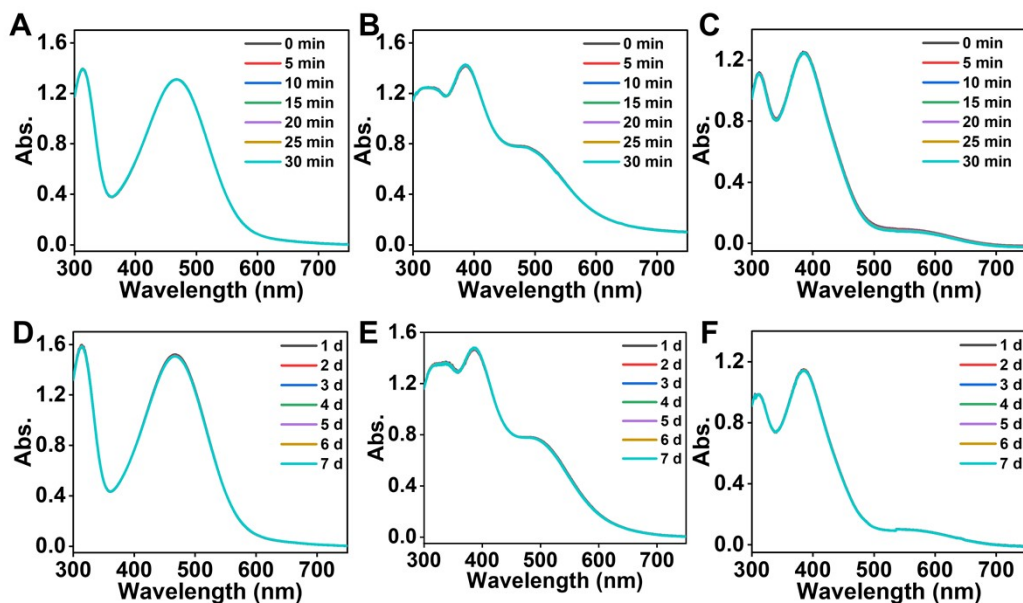

**Fig. S10** The stability of **RuH**, **RuCl** and **RuBr** under US irradiation (1 MHz, 50% duty cycle, 1 W/cm<sup>2</sup>) for 30 min (A) and 7 days in PBS (B).

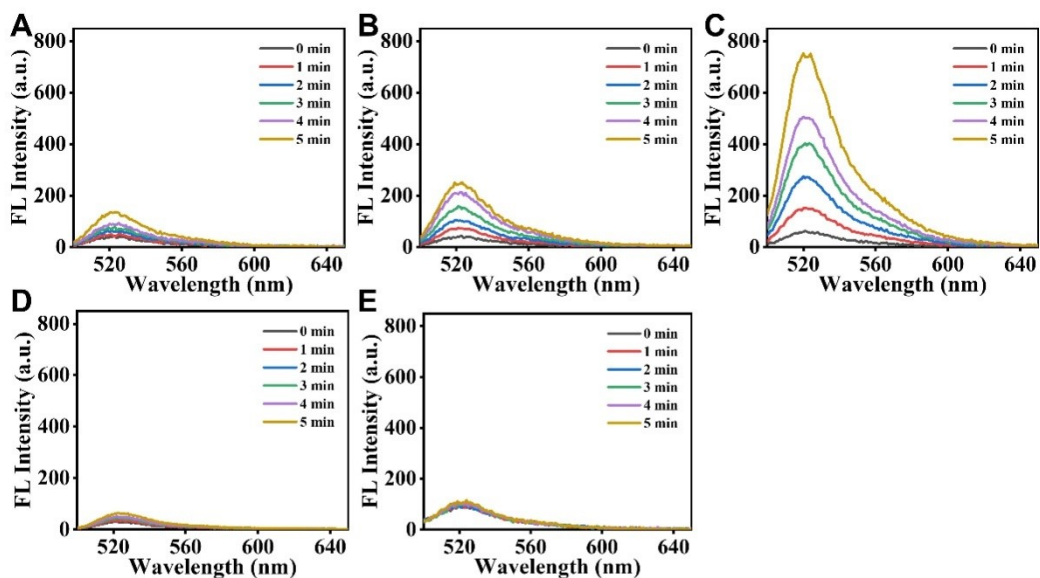

**Fig. S11** FL intensity of DCFH by US-activity with **RuH**(A), **RuCl** (B), **RuBr** (C), Ru(bpy)<sub>3</sub>Cl<sub>2</sub> (D) and H<sub>2</sub>O (E) for 5 min.

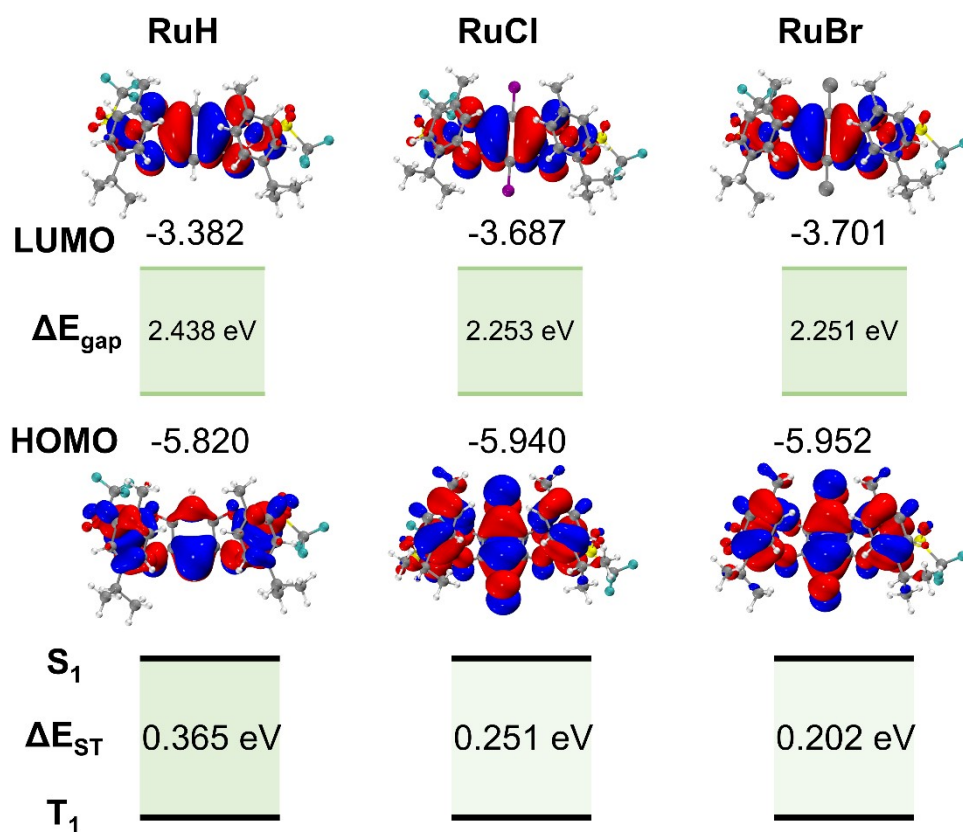

Fig. S12 LUMO, HOMO,  $E_{\text{gap}}$  and  $\Delta E_{\text{ST}}$  of RuH, RuCl, RuBr.

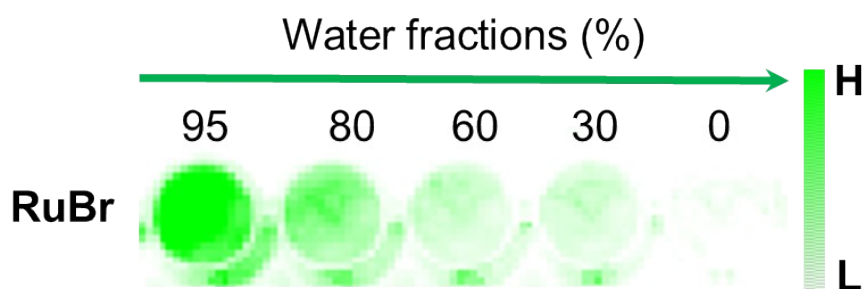

Fig. S13 FL images of DCFH under US irradiation (1 MHz, 50% duty cycle, 1 W/cm<sup>2</sup>, 1 min) with RuBr with different water fractions.

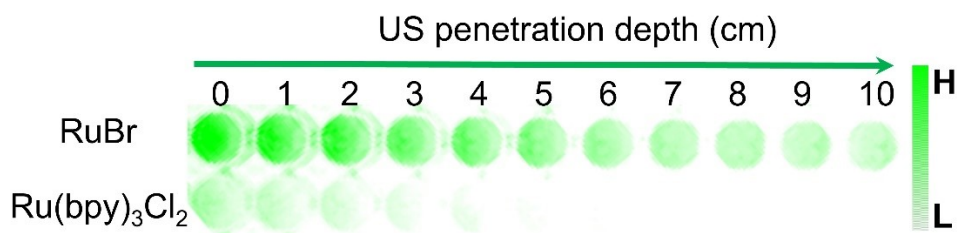

**Fig. S14** FL images of DCFH under ultrasound irradiation (1 MHz, 50% duty cycle, 1 W/cm<sup>2</sup>, 1 min) with **RuBr** and **Ru(bpy)<sub>3</sub>Cl<sub>2</sub>** with different depth of agarose blocks (containing 1% intralipid and 1% agarose).

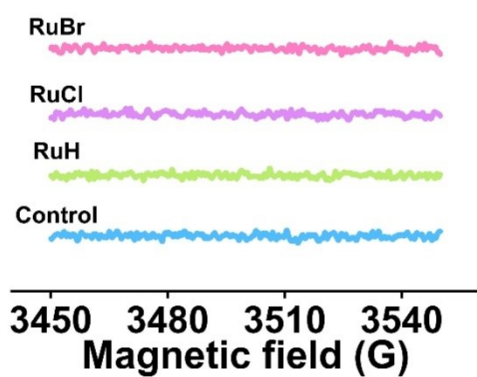

**Fig. S15** ESR spectra of **RuH**, **RuCl** and **RuBr** under US irradiation (1 MHz, 50% duty cycle, 1 W/cm<sup>2</sup>, 1 min) with DMPO as capture agent.

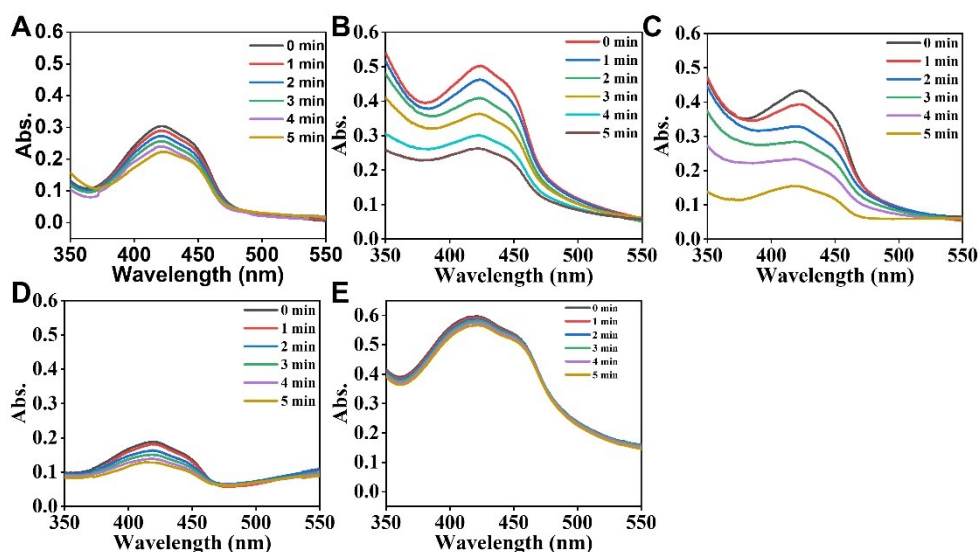

**Fig. S16** UV-vis spectrum of DPBF by US-activity (1 MHz, 50% duty cycle, 1 W/cm<sup>2</sup>) with **RuH** (A), **RuCl** (B), **RuBr** (C), **Ru(bpy)<sub>3</sub>Cl<sub>2</sub>**(D) and **H<sub>2</sub>O** (E) for 5 min.

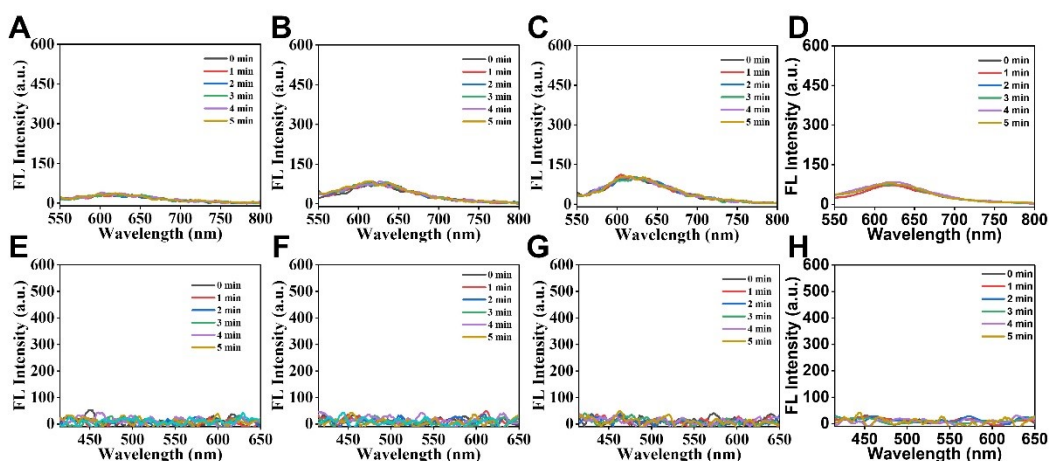

**Fig. S17** The detection of  $O_2^-$  in **RuH** (A), **RuCl** (B), **RuBr** (C) and **H<sub>2</sub>O** (D) solution by using DHE (5  $\mu$ M) after US irradiation (1 MHz, 50% duty cycle, 1 W/cm<sup>2</sup>, 5 min),  $\lambda_{ex} = 488$  nm. The detection of  $\bullet OH$  in **RuH** (E), **RuCl** (F), **RuBr** (G) and **H<sub>2</sub>O** (H) solution using 3-CCA (5  $\mu$ M) after US irradiation (1 MHz, 50% duty cycle, 1 W/cm<sup>2</sup>, 5 min),  $\lambda_{ex} = 405$  nm.

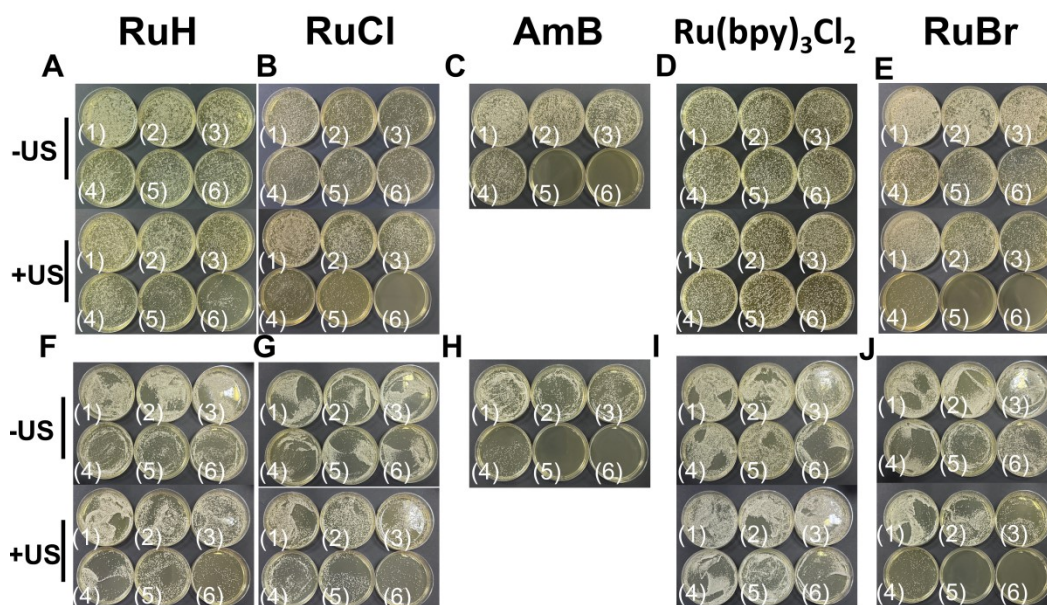

**Fig. S18** PA images of *C. albicans* (A-E) and *C. glabrata* (F-J) after incubated with different concentration of **RuH**, **RuCl**, **RuBr**,  $\text{Ru}(\text{bpy})_3\text{Cl}_2$  and **AmB** with/without US irradiation (1 MHz, 50% duty cycle, 1 W/cm<sup>2</sup>) : 0  $\mu\text{M}$  (1), 2.5  $\mu\text{M}$  (2), 5  $\mu\text{M}$  (3), 10  $\mu\text{M}$  (4), 20  $\mu\text{M}$  (5), 40  $\mu\text{M}$  (6).

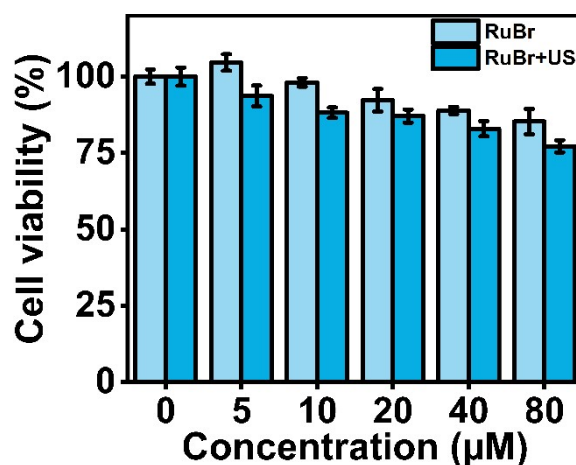

**Fig. S19** The relative cellular viability of L929 cells treated with various concentrations of **RuBr** (2.5-40  $\mu\text{M}$ ) with/without US irradiation (1 MHz, 50% duty cycle, 1 W/cm<sup>2</sup>, 5 min) (n = 3 independent experiments).

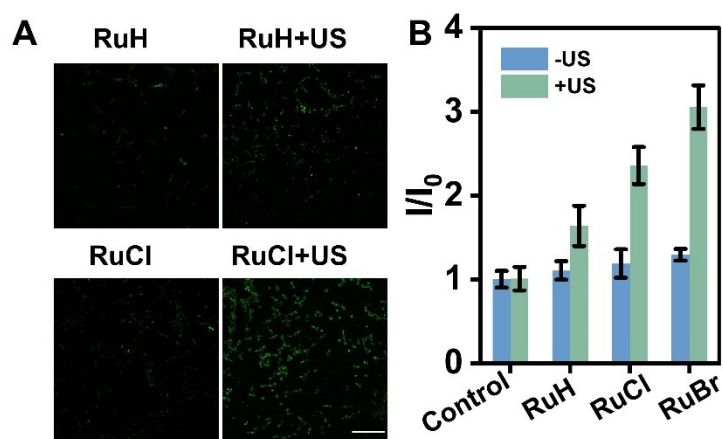

**Fig. S20** Fluorescence images (A) and semiquantitative statistics of ROS fluorescence intensity (B) of *C. albicans* stained by DCFH after incubation with **RuH**, **RuCl** and **RuBr**, with or without US irradiation (1 W/cm<sup>2</sup>, 5 min). Scale bar: 20  $\mu$ m.

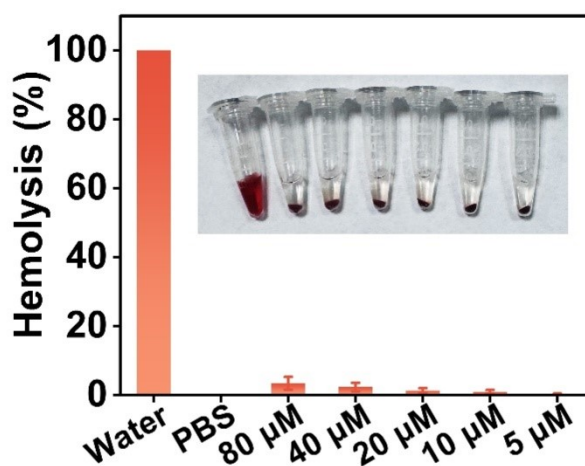

**Fig. S21** The hemolysis rate of red blood cells after incubation with different concentrations of **RuBr** (n = 3 independent experiments).

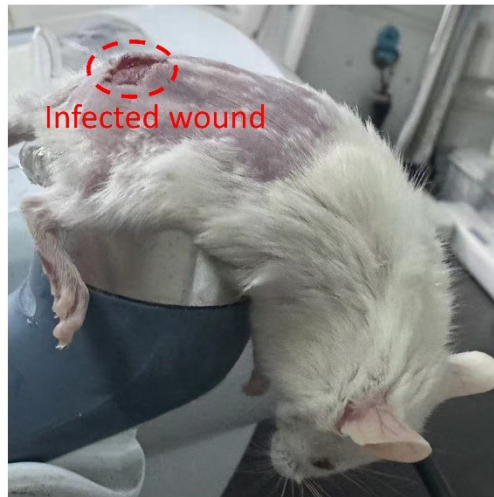

**Fig. S22** Schematic of in vivo ultrasound.

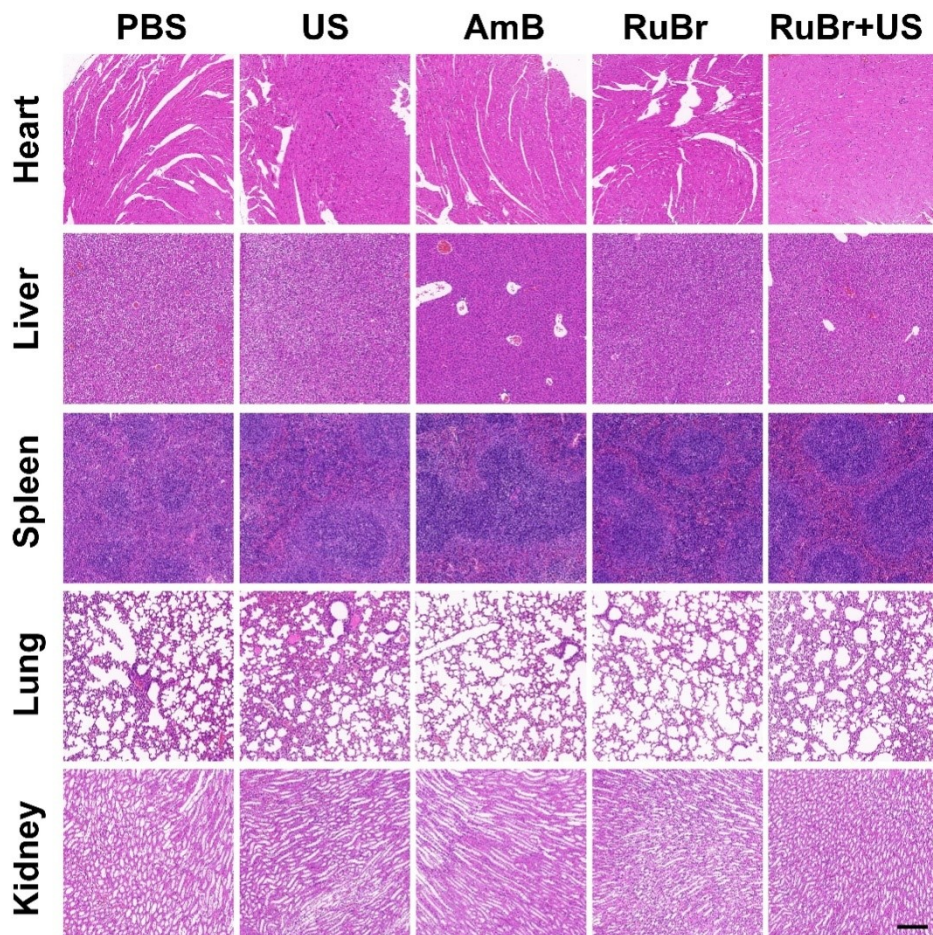

**Fig. S23** H&E staining of different organ slices collected from fungi infections mice models at 6 days. Scale bar, 100  $\mu$ m.
